# Supplementary material
Source: MDPI journal article supplement (https://www.mdpi.com/2039-4403/14/1/6)
Supplement: s1 [file s1]

# Agotamiento, estrés, escasez de personal... ¿Te resulta familiar?

¿Te gustaría ser entrevistad@ sobre cómo te hace sentir la enfermería actual y cómo afecta a la atención al paciente?

Estamos buscando voluntari@s en enfermería para unirse a un estudio de la UIB sobre cómo nos afecta el burnout y como podemos mejorar la situación desde la perspectiva de la enfermería.

Para reservar tu entrevista o más información, ponte en contacto con:

[s.flowers@uib.cat](mailto:s.flowers@uib.cat)



# **Burnout, stress, short-staffing...**

## **Sound familiar?**

**Would you like to be interviewed about how nursing today makes you feel and how it affects patient care?**

**We are looking for student & nurse volunteers to join a study at the UIB to explore how work conditions affect our capacity to deliver compassionate care, from the perspective of those working on the ground.**

**To reserve your interview or for more information,  
please contact:  
[s.flowers@uib.cat](mailto:s.flowers@uib.cat)**
